# Supplementary material for: Association of Dialysate Bicarbonate with Arrhythmia in the Monitoring in Dialysis Study
Source: PubMed Central journal article supplement — Kidney360. 2024 Aug 6;5(10):1490–9. doi: 10.34067/KID.0000000000000537 (PMC11556930; doi:10.34067/kid.0000000000000537), 2024-08-06
Supplement: kidney360-5-1490-s002.pdf [file kidney360-5-1490-s002.pdf]

## **Supplemental File Table of Contents**

**Supplemental Table 1.** Characteristics of the participants at baseline according to country of origin

**Supplemental Table 2.** Characteristics of the dialysis prescription at baseline according to country of origin

**Supplemental Table 3.** Laboratory values by hemodialysis sessions

**Supplemental Table 4.** Characteristics of the hemodialysis prescriptions by hemodialysis sessions

**Supplemental Table 1.** Characteristics of the participants at baseline according to country of origin

| Baseline Characteristics       | All subjects (n=66) | United States (n=43) | India (n=23)   | p-value <sup>1</sup> |
|--------------------------------|---------------------|----------------------|----------------|----------------------|
| Age, years                     | 56 ± 12             | 56 ± 12              | 57 ± 13        | 0.66                 |
| Male, n (%)                    | 46 (70)             | 27 (63)              | 19 (83)        | 0.16                 |
| Race, n (%)                    |                     |                      |                | <0.001               |
| Asian                          | 23 (35)             | 0 (0)                | 23 (100)       |                      |
| Black                          | 35 (53)             | 35 (82)              | 0 (0)          |                      |
| White                          | 7 (11)              | 7 (16)               | 0 (0)          |                      |
| Other                          | 1 (1)               | 1 (2)                | 0 (0)          |                      |
| ESKD vintage, years            | 2.4 [1.2, 5.3]      | 3.5 [1.2, 5.7]       | 2.2 [1.1, 3.0] | <0.001               |
| Vascular access, n (%)         |                     |                      |                | 0.001                |
| AV fistula                     | 46 (71)             | 25 (59)              | 21 (91)        |                      |
| AV graft                       | 16 (25)             | 15 (36)              | 1 (4)          |                      |
| Catheter                       | 3 (5)               | 2 (5)                | 1 (4)          |                      |
| Comorbid conditions, n (%)     |                     |                      |                |                      |
| Diabetes mellitus              | 28 (43)             | 15 (35)              | 13 (56)        | 0.01                 |
| Hyperlipidemia                 | 40 (61)             | 32 (74)              | 8 (35)         | 0.003                |
| Hypertension                   | 56 (85)             | 42 (98)              | 14 (61)        | <0.001               |
| Ischemic heart disease         | 32 (48)             | 22 (51)              | 10 (44)        | 0.61                 |
| Congestive heart failure       | 17 (26)             | 17 (40)              | 0 (0)          | <0.001               |
| Arrhythmia                     | 21 (32)             | 21 (49)              | 0 (0)          | <0.001               |
| Atrial fibrillation            | 7 (11)              | 7 (16)               | 0 (0)          | 0.09                 |
| Systolic blood pressure, mmHg  | 141 ± 23            | 140 ± 26             | 143 ± 18       | 0.57                 |
| Diastolic blood pressure, mmHg | 77 ± 13             | 76 ± 15              | 79 ± 7         | 0.18                 |
| Medication use, n(%)           |                     |                      |                |                      |
| Aspirin                        | 30 (45)             | 21 (49)              | 9 (39)         | 0.60                 |
| Statin                         | 32 (48)             | 20 (47)              | 12 (52)        | 0.80                 |
| ACEI or ARB                    | 22 (33)             | 20 (47)              | 2 (9)          | <0.01                |
| Beta-blockers                  | 36 (55)             | 25 (58)              | 11 (48)        | 0.45                 |
| Pre-dialysis Laboratory values |                     |                      |                |                      |
| Blood urea nitrogen, mg/dL     | 60 ± 18             | 59 ± 16              | 62 ± 22        | 0.47                 |
| Creatinine, mg/dL              | 10.0 ± 3.4          | 10.9 ± 3.5           | 8.3 ± 2.4      | 0.01                 |
| Sodium, mEq/L                  | 137 ± 4             | 138 ± 4              | 134 ± 4        | <0.001               |
| Potassium, mEq/L               | 5.0 ± 1.0           | 4.8 ± 0.7            | 5.4 ± 1.3      | 0.07                 |
| Calcium, mg/dL                 | 8.7 ± 0.8           | 8.8 ± 0.8            | 8.4 ± 0.8      | 0.08                 |
| Bicarbonate, mEq/L             | 22 ± 4              | 23.8 ± 2.9           | 18.8 ± 2.9     | <0.001               |
| Magnesium, mg/dL               | 2.4 ± 0.5           | 2.2 ± 0.3            | 2.8 ± 0.6      | 0.001                |
| Phosphorus, mg/dL              | 5.5 ± 2.0           | 5.7 ± 2.1            | 5.0 ± 1.9      | 0.19                 |
| Hemoglobin, g/dL               | 11 ± 1              | 10.8 ± 1.0           | 10 ± 2         | 0.12                 |
| Serum albumin, g/dL            | 3.9 ± 0.3           | 4.0 ± 0.3            | 3.8 ± 0.4      | 0.01                 |

Continuous variables are presented as means ± standard deviation or median [25<sup>th</sup>, 75<sup>th</sup> percentiles].

<sup>1</sup>p-value from analysis of variance (ANOVA) for continuous variables, or Chi-square or Fisher's Exact Tests for categorical variables, as appropriate.

Abbreviations: ESKD, end-stage kidney disease; AV, arteriovenous; ACEI, angiotensin converting enzyme inhibitor; ARB, angiotensin receptor blocker.

Percentages may not add to 100 due to rounding.

**Supplemental Table 2.** Characteristics of the dialysis prescription at baseline according to country of origin

| Baseline Characteristics                  | All subjects (n=66) | United States (n=43) | India (n=23)    | p-value <sup>1</sup> |
|-------------------------------------------|---------------------|----------------------|-----------------|----------------------|
| Duration of hemodialysis, hours           | 4.0 [3.0, 6.0]      | 3.8 [3.0, 5.0]       | 4.0 [3.0, 6.0]  | 0.20                 |
| spKt/V                                    | 1.5 ± 0.4           | 1.5 ± 0.3            | 1.4 ± 0.6       | 0.44                 |
| Pre-dialysis weight, kg                   | 86.7 ± 28.8         | 97.6 ± 28.7          | 66.5 ± 14.9     | <0.001               |
| Kg over dry weight target before dialysis | 4.2 [-0.4, 12.0]    | 4.5 [0.7, 12.0]      | 4.1 [-0.4, 6.3] | 0.07                 |
| UFR, ml/kg/h                              | 10 ± 4              | 10 ± 4               | 10 ± 4          | 0.74                 |
| Dialysate Flow, mL/min                    | 600 [500, 800]      | 664 [600, 800]       | 500 [485, 500]  | <0.001               |
| Blood Flow, mL/min                        | 390 [324, 461]      | 437 [391, 491]       | 302 [262, 332]  | <0.001               |
| High-flux dialyzer, n (%)                 | 42 (64)             | 40 (93)              | 2 (8.7)         | <0.001               |
| Membrane reuse, n (%)                     | 18 (27)             | 10 (23)              | 8 (35)          | 0.39                 |
| Cellulose membrane, n (%)                 | 5 (8)               | 0 (0)                | 5 (22)          | <0.01                |
| Dialysate temperature, n (%)              |                     |                      |                 | <0.01                |
| 35.5 Celsius                              | 1 (2)               | 1 (2)                | 0 (0)           |                      |
| 36.0 Celsius                              | 3 (5)               | 3 (7)                | 0 (0)           |                      |
| 36.5 Celsius                              | 5 (8)               | 0 (0)                | 5 (22)          |                      |
| 37.0 Celsius                              | 57 (86)             | 39 (91)              | 18 (78)         |                      |
| Dialysate potassium, n (%)                |                     |                      |                 | <0.01                |
| 1.0 mEq/L                                 | 1 (2)               | 1 (2)                | 0 (0)           |                      |
| 2.0 mEq/L                                 | 53 (80)             | 30 (70)              | 13 (100)        |                      |
| 3.0 mEq/L                                 | 11 (17)             | 11 (26)              | 0 (0)           |                      |
| 4.0 mEq/L                                 | 1 (2)               | 1 (2)                | 0 (0)           |                      |
| Dialysate calcium, n (%)                  |                     |                      |                 | <0.001               |
| 1.5 and 1.6 mEq/L                         | 13 (20)             | 0 (0)                | 13 (56)         |                      |
| 2.0 and 2.5 mEq/L                         | 39 (59)             | 39 (91)              | 0 (0)           |                      |
| 3.0 and 3.5 mEq/L                         | 14 (21)             | 4 (9)                | 10 (44)         |                      |
| Dialysate sodium, n (%)                   |                     |                      |                 | 0.45                 |
| 135 mEq/L                                 | 6 (10)              | 3 (7)                | 3 (17)          |                      |
| 138 mEq/L                                 | 6 (10)              | 4 (9)                | 2 (11)          |                      |
| 140 mEq/L                                 | 49 (80)             | 36 (84)              | 13 (72)         |                      |
| Dialysate Bicarbonate, n (%)              |                     |                      |                 | <0.001               |
| 24 - 32 mEq/L                             | 16 (24)             | 6 (14)               | 10 (43)         |                      |
| 33 - 36 mEq/L                             | 34 (52)             | 21 (49)              | 13 (57)         |                      |
| 37 - 40 mEq/L                             | 16 (24)             | 16 (37)              | 0 (0)           |                      |

Continuous variables are presented as means ± standard deviation or median [25<sup>th</sup>, 75<sup>th</sup> percentiles].

<sup>1</sup>p-value from analysis of variance (ANOVA) for continuous variables, or Chi-square or Fisher's Exact Tests for categorical variables, as appropriate.

Abbreviations: spKt/V, single-pool Kt/V; UFR, ultrafiltration rate.

Percentages may not add to 100 due to rounding.

Note: Blood flow rate is the mean of 12 timepoints during the baseline dialysis session.

**Supplemental Table 3.** Laboratory values by hemodialysis sessions

| Pre-dialysis serum laboratory values            | All Sessions<br>n=4720 | Dialysate Bicarbonate Recorded<br>n=3655 | Dialysate Bicarbonate <35<br>n=816 | Dialysate Bicarbonate =35<br>n=1552 | Dialysate Bicarbonate >35<br>n=1287 | p-value |
|-------------------------------------------------|------------------------|------------------------------------------|------------------------------------|-------------------------------------|-------------------------------------|---------|
| Blood urea nitrogen, mg/dL (number of sessions) | 56.6 ± 17.1 (1713)     | 56.8±16.9 (1232)                         | 51.2 ± 15.2 (257)                  | 57.4 ± 18.8 (551)                   | 59.5 ± 14.5 (424)                   | <0.001  |
| Creatinine, mg/dL (number of sessions)          | 9.9 ± 3.3 (1713)       | 10.0 ± 3.3 (1232)                        | 9.0 ± 2.3 (257)                    | 9.5 ± 3.2 (551)                     | 11.3 ± 3.5 (424)                    | <0.001  |
| Sodium, mEq/L (number of sessions)              | 136.8 ± 4.3 (1713)     | 136.9 ± 3.9 (1232)                       | 135.8 ± 3.8 (257)                  | 136.4 ± 3.5 (551)                   | 138.2 ± 4.0 (424)                   | <0.001  |
| Potassium, mEq/L (number of sessions)           | 4.9 ± 0.8 (1704)       | 4.9 ± 0.8 (1225)                         | 4.9 ± 0.8 (251)                    | 4.8 ± 0.8 (550)                     | 4.8 ± 0.7 (424)                     | 0.92    |
| Calcium, mg/dL (number of sessions)             | 8.7 ± 0.9 (1713)       | 8.7 ± 0.8 (1232)                         | 8.6 ± 0.8 (257)                    | 8.7 ± 0.9 (551)                     | 8.9 ± 0.8 (424)                     | <0.001  |
| Bicarbonate, mEq/L (number of sessions)         | 22.2 ± 4.0 (1712)      | 22.3 ± 4.0 (1232)                        | 21.6 ± 4.4 (257)                   | 20.7 ± 3.4 (551)                    | 24.8 ± 3.0 (424)                    | <0.001  |
| Magnesium, mg/dL (number of sessions)           | 2.4 ± 0.5 (1713)       | 2.4 ± 0.5 (1232)                         | 2.3 ± 0.5 (257)                    | 2.4 ± 0.5 (551)                     | 2.3 ± 0.3 (424)                     | <0.001  |
| Phosphorus, mg/dL (number of sessions)          | 5.2 ± 1.7 (1711)       | 5.4 ± 1.6 (1230)                         | 4.8 ± 1.3 (255)                    | 5.3 ± 1.7 (551)                     | 5.7 ± 1.7 (424)                     | <0.001  |
| Hemoglobin, g/dL (number of sessions)           | 10.6 ± 1.2 (394)       | 10.7 ± 1.2 (246)                         | 10.4 ± 1.1 (58)                    | 10.6 ± 1.1 (109)                    | 11.3 ± 1.2 (79)                     | <0.001  |
| Serum albumin, g/dL (number of sessions)        | 3.9 ± 0.4 (1713)       | 3.9 ± 0.4 (1232)                         | 3.8 ± 0.3 (257)                    | 3.9 ± 0.4 (551)                     | 4.0 ± 0.3 (424)                     | <0.001  |

Data are presented as means ± standard deviation.  
p-value from analysis of variance (ANOVA).  
No adjustment of repeated measures within subject.

**Supplemental Table 4.** Characteristics of the hemodialysis prescriptions by hemodialysis sessions

| Dialysis Parameters                                            | All Sessions<br>n=4720 | Dialysate<br>Bicarbonate<br>Recorded<br>n=3655 | Dialysate<br>Bicarbonate<br><35<br>n=816 | Dialysate<br>Bicarbonate<br>=35<br>n=1552 | Dialysate<br>Bicarbonate<br>>35<br>n=1287 | p-value |
|----------------------------------------------------------------|------------------------|------------------------------------------------|------------------------------------------|-------------------------------------------|-------------------------------------------|---------|
| Duration of hemodialysis, hours (number of sessions)           | 4.0 [3.5, 4.0] (3655)  | 4.0 [3.5, 4.0] (3655)                          | 4.0 [4.0, 4.0] (816)                     | 4.0 [3.5, 4.0] (1552)                     | 4.0 [3.5, 4.0] (1287)                     | <0.001  |
| spKt/V (number of sessions)                                    | 1.5 ± 0.4 (1643)       | 1.5 ± 0.4 (1197)                               | 1.5 ± 0.6 (247)                          | 1.4 ± 0.4 (536)                           | 1.5 ± 0.3 (414)                           | <0.001  |
| Pre-dialysis weight, kg (number of sessions)                   | 89.1 ± 28.3 (3655)     | 89.1 ± 28.3 (3655)                             | 73.5 ± 17.1 (816)                        | 84.6 ± 20.5 (1552)                        | 104.2 ± 34.2 (1287)                       | <0.001  |
| kg over dry weight target before dialysis (number of sessions) | 3.0 [1.8, 4.1] (3647)  | 3.0 [1.8, 4.1] (3647)                          | 3.0 [1.8, 4.0] (816)                     | 2.6 [1.5, 3.7] (1545)                     | 3.4 [2.3, 4.7] (1286)                     | <0.001  |
| UFR, mL/kg/h (number of sessions)                              | 9.7 ± 4.6 (3641)       | 9.7 ± 4.6 (3641)                               | 9.9 ± 4.5 (816)                          | 9.0 ± 4.3 (1543)                          | 10.4 ± 4.9 (1282)                         | <0.001  |
| Dialysate Flow, mL/min (number of sessions)                    | 600 [500, 800] (3652)  | 600 [500, 800] (3652)                          | 575 [500, 800] (816)                     | 600 [500, 600] (1549)                     | 600 [600.0, 800.0] (1287)                 | <0.001  |
| Blood Flow, mL/min (number of sessions)                        | 393 [346, 467] (3655)  | 393 [346, 467] (3655)                          | 333 [300, 467] (816)                     | 367 [333, 400] (1552)                     | 465.0 [400, 500] (1287)                   | <0.001  |
| High-flux dialyzer, n (%)                                      | 2476 (68)              | 2476 (68)                                      | 410 (50)                                 | 805 (52)                                  | 126 (98)                                  | <0.001  |
| Membrane reuse, n (%)                                          | 1009 (27)              | 1009 (28)                                      | 24 (3)                                   | 733 (47)                                  | 252 (20)                                  | <0.001  |
| Cellulose membrane, n (%)                                      | 279 (8)                | 279 (8)                                        | 64 (8)                                   | 215 (14)                                  | 0 (0)                                     |         |
| Dialysate temperature, n (%)                                   |                        |                                                |                                          |                                           |                                           | <0.001  |
| 35.5 Celsius                                                   | 72 (2)                 | 72 (2)                                         | 0 (0)                                    | 0 (0)                                     | 72 (6)                                    |         |
| 36.0 Celsius                                                   | 192 (5)                | 192 (5)                                        | 0 (0)                                    | 73 (5)                                    | 119 (9)                                   |         |
| 36.5 Celsius                                                   | 323 (9)                | 323 (9)                                        | 0 (0)                                    | 323 (21)                                  | 0 (0)                                     |         |
| 37.0 Celsius                                                   | 3048 (84)              | 3048 (84)                                      | 803 (100)                                | 1150 (74)                                 | 1095 (85)                                 |         |
| Dialysate potassium, n (%)                                     |                        |                                                |                                          |                                           |                                           | <0.001  |
| 1.0 mEq/L                                                      | 65 (2)                 | 65 (2)                                         | 0 (0)                                    | 1 (0)                                     | 64 (5)                                    |         |
| 2.0 mEq/L                                                      | 2916 (80)              | 2916 (80)                                      | 569 (72)                                 | 1342 (87)                                 | 1005 (78)                                 |         |
| 3.0 mEq/L                                                      | 645 (18)               | 645 (18)                                       | 223 (28)                                 | 204 (13)                                  | 218 (17)                                  |         |

| Dialysis Parameters      | All Sessions<br>n=4720 | Dialysate<br>Bicarbonate<br>Recorded<br>n=3655 | Dialysate<br>Bicarbonate<br><35<br>n=816 | Dialysate<br>Bicarbonate<br>=35<br>n=1552 | Dialysate<br>Bicarbonate<br>>35<br>n=1287 | p-value |
|--------------------------|------------------------|------------------------------------------------|------------------------------------------|-------------------------------------------|-------------------------------------------|---------|
| 4.0 mEq/L                | 5 (0)                  | 5 (0)                                          | 0 (0)                                    | 5 (0)                                     | 0 (0)                                     |         |
| Dialysate calcium, n (%) |                        |                                                |                                          |                                           |                                           | <0.001  |
| 1.5 and 1.6 mEq/L        | 735 (20)               | 735 (20)                                       | 64 (8)                                   | 671 (43)                                  | 0 (0)                                     |         |
| 2.0 and 2.5 mEq/L        | 2247 (62)              | 2247 (62)                                      | 410 (50)                                 | 807 (52)                                  | 1030 (80)                                 |         |
| 3.0 and 3.5 mEq/L        | 672 (18)               | 672 (18)                                       | 342 (42)                                 | 73 (5)                                    | 257 (20)                                  |         |
| Dialysate sodium, n (%)  |                        |                                                |                                          |                                           |                                           | <0.001  |
| 135 mEq/L                | 424 (12)               | 424 (12)                                       | 83 (13)                                  | 239 (15)                                  | 102 (8)                                   |         |
| 138 mEq/L                | 273 (8)                | 273 (8)                                        | 64 (10)                                  | 97 (6)                                    | 112 (9)                                   |         |
| 140 mEq/L                | 2726 (79)              | 2726 (79)                                      | 471 (76)                                 | 1182 (76)                                 | 1073 (83)                                 |         |

Continuous variables are presented as means  $\pm$  standard deviation or median [25<sup>th</sup>, 75<sup>th</sup> percentiles].

p-value from analysis of variance (ANOVA) for continuous variables, or Chi-square or Fisher's Exact Tests for categorical variables, as appropriate.

Abbreviations: spKt/V, single-pool Kt/V; UFR, ultrafiltration rate.

Note: Blood flow rate is the mean of 12 timepoints during each HD session assessed.

No adjustment for repeated measures within subject.
